# Supplementary material for: Acceptability and appropriateness of a clinical pathway for managing anxiety and depression in cancer patients: a mixed methods study of staff perspectives
Source: PubMed Central journal article supplement (PMC8600707; doi:10.1186/s12913-021-07252-z), 2021-11-17

Additional File 2. Management recommendations for each ADAPT CP step allocation

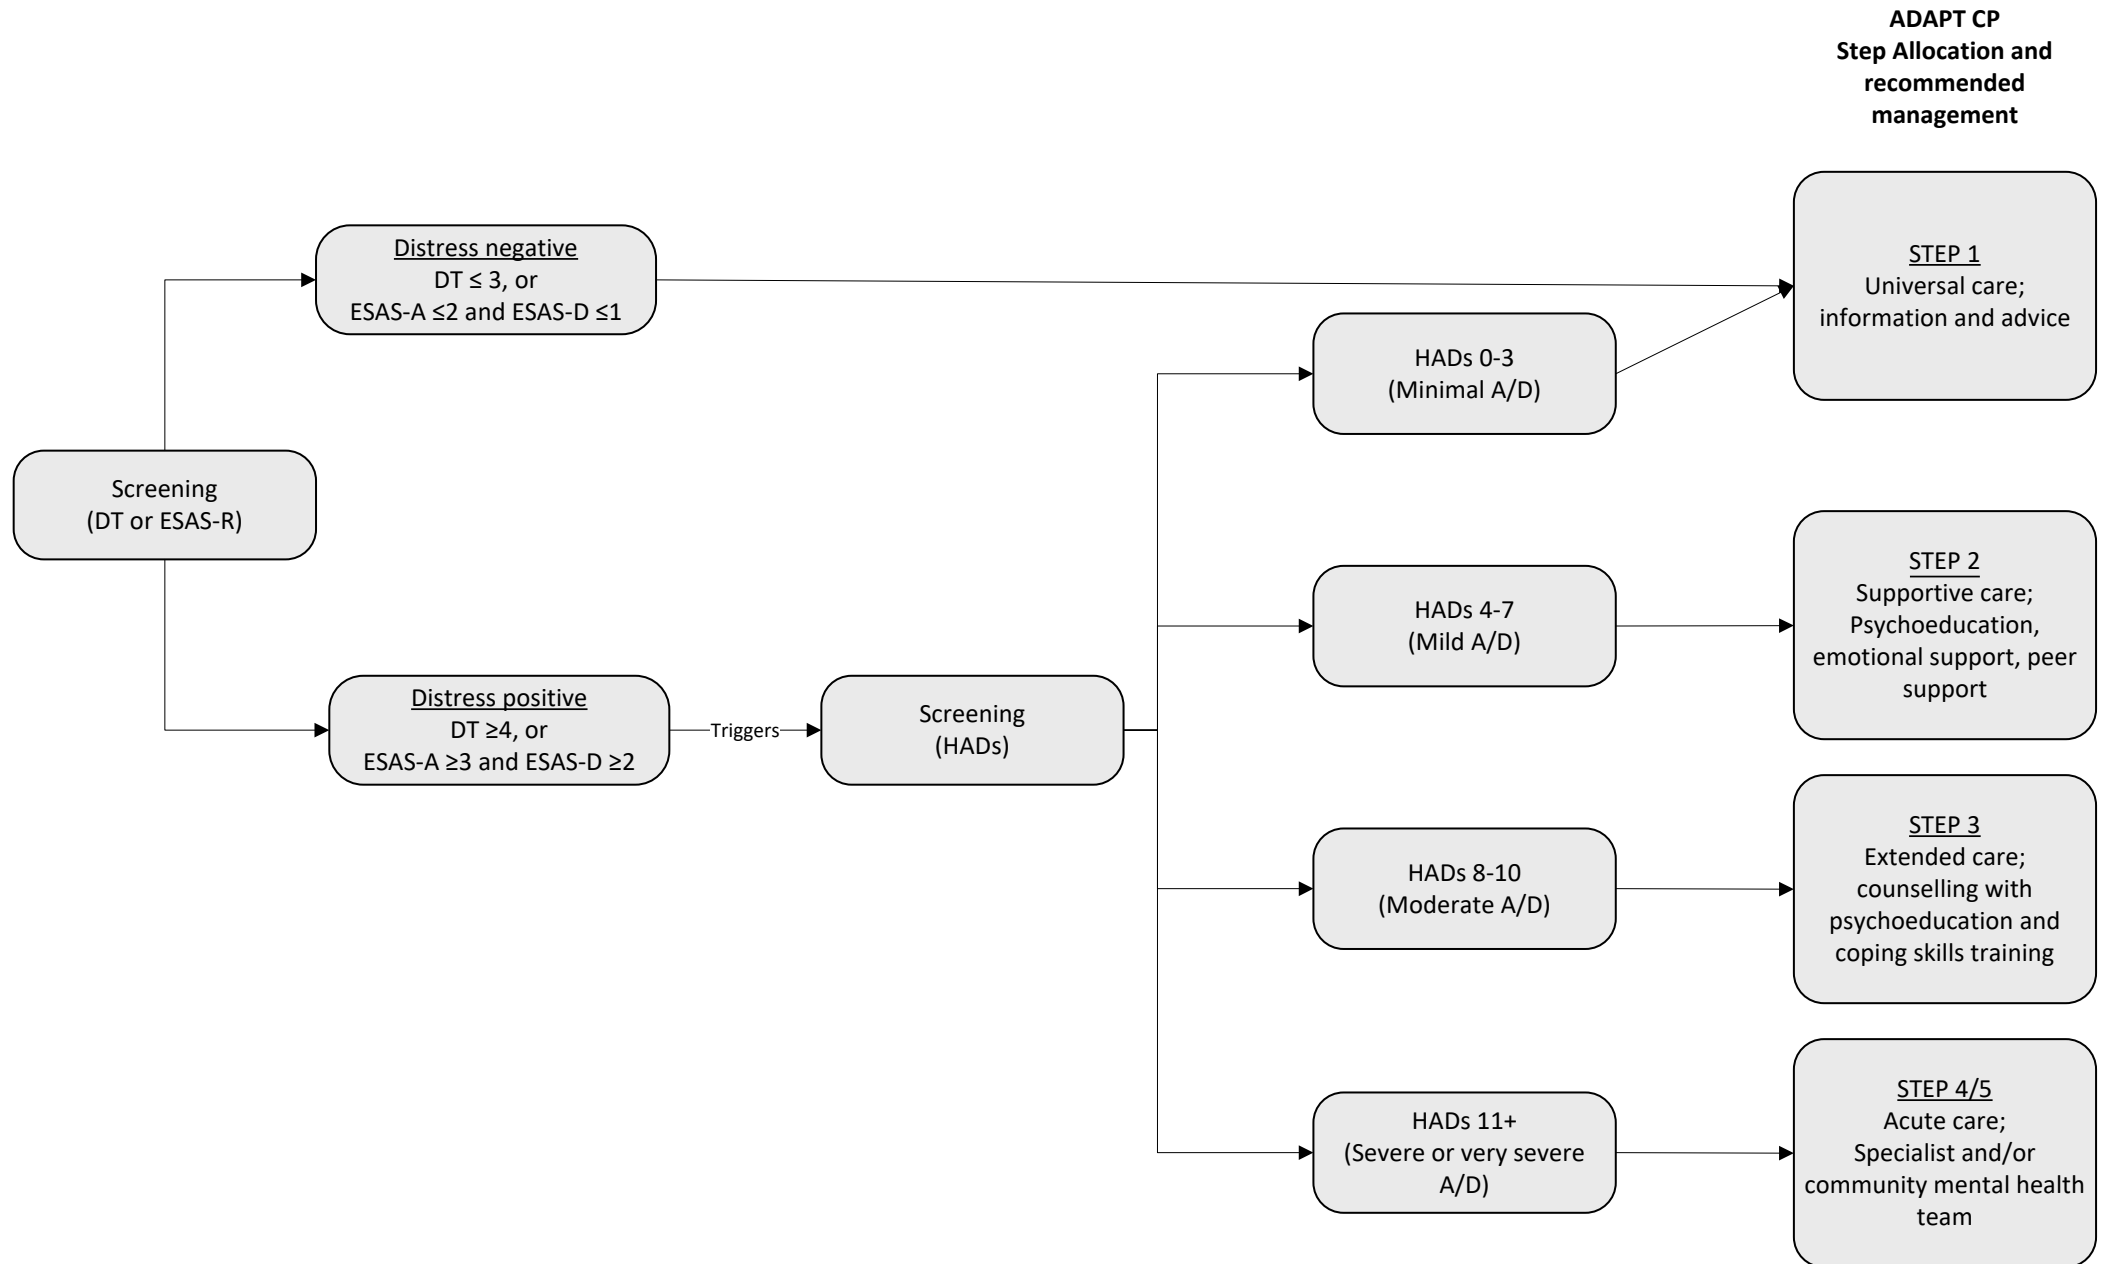

Supplement: 12913_2021_7252_MOESM2_ESM.pdf [file 12913_2021_7252_MOESM2_ESM.pdf]
