# Supplementary material for: Acceptability and appropriateness of a clinical pathway for managing anxiety and depression in cancer patients: a mixed methods study of staff perspectives
Source: Springer Nature journal article supplement (doi:10.1186/s12913-021-07252-z), 2021-11-17

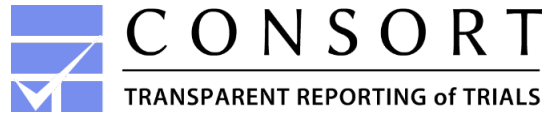

**CONSORT 2010 Flow Diagram**

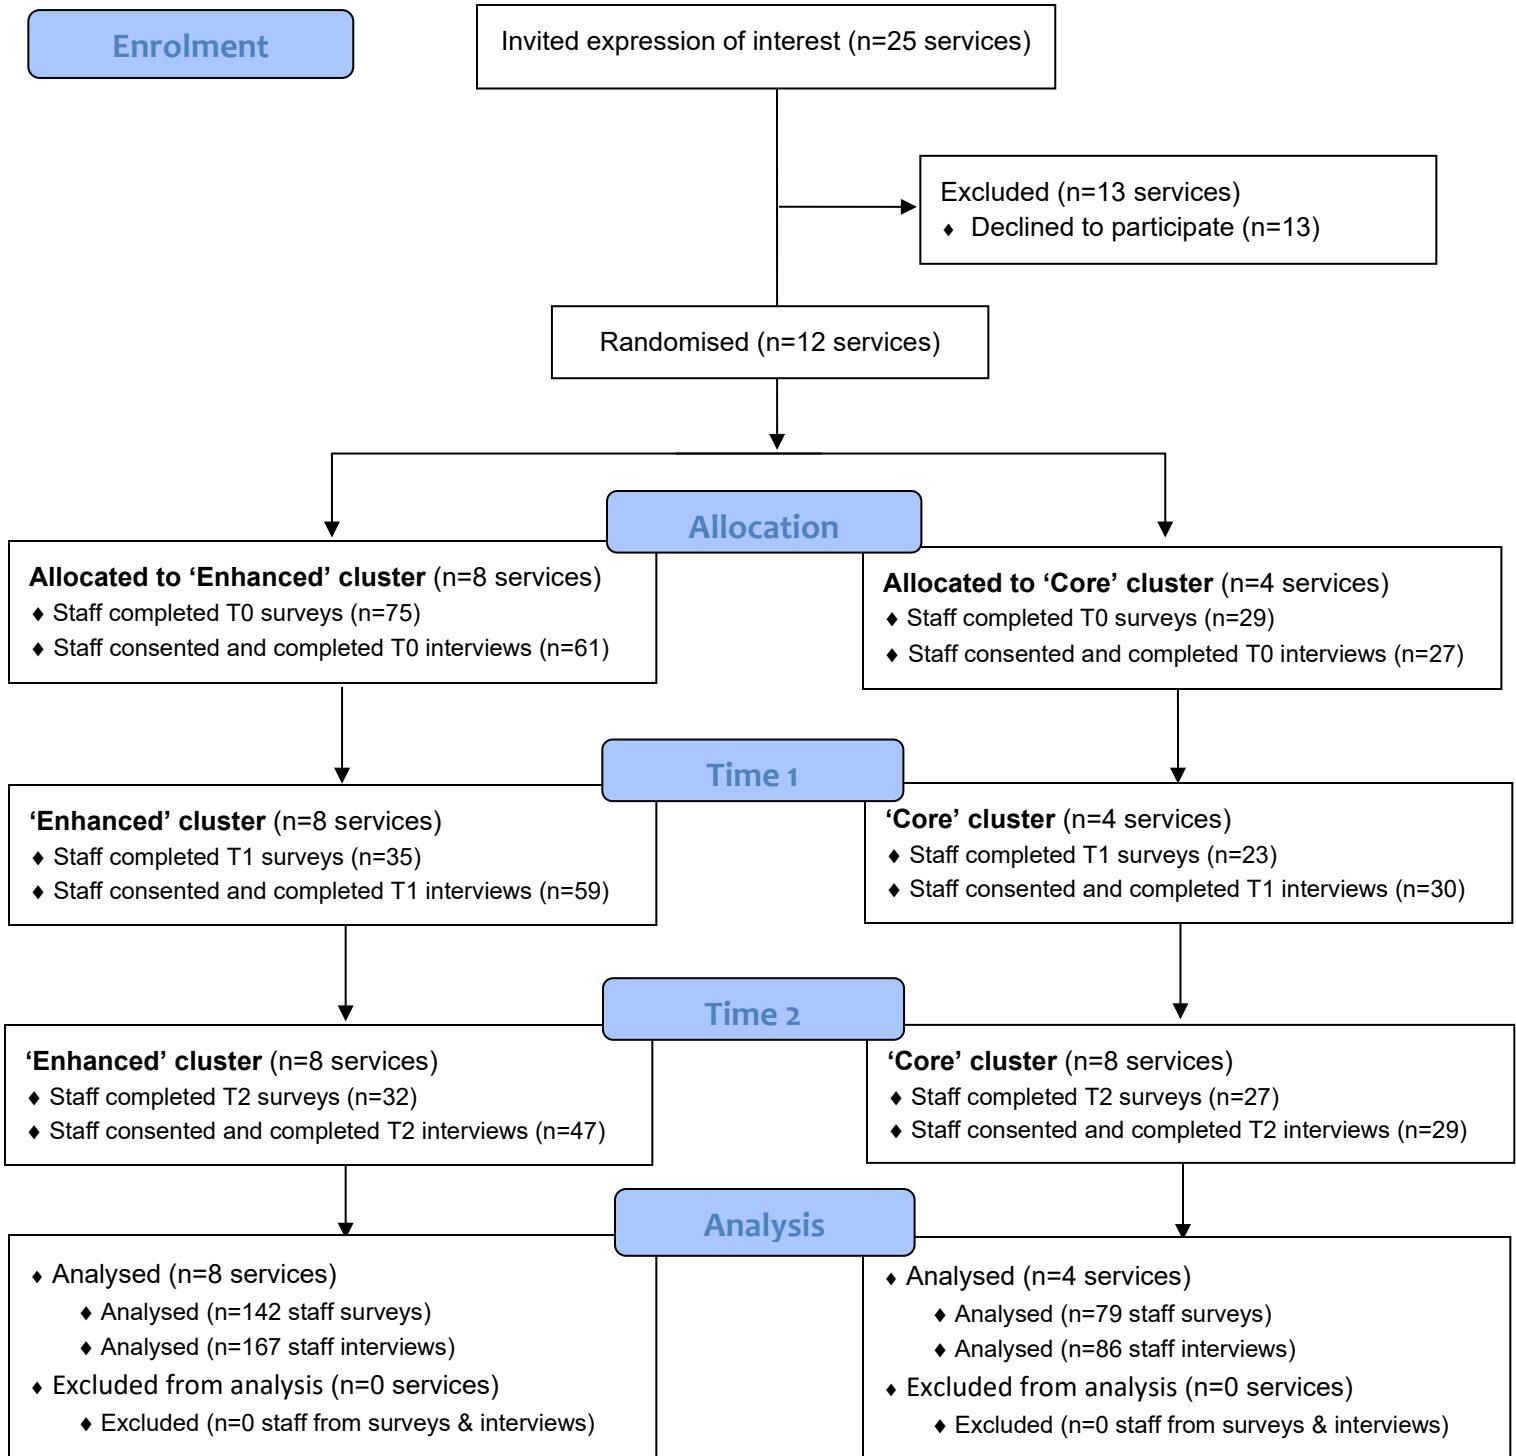

Supplement: MOESM1 [file 19876640]
